# Supplementary material for: Suicide in South Asia: a scoping review
Source: Springer Nature journal article supplement (doi:10.1186/s12888-014-0358-9), 2014-12-01
Supplement: MOESM2 [file 9747648]

Additional file 3: Male to female ratios of suicide rates

|              | <b>Sri Lanka</b><br>(Male : Female) |                | <b>India</b><br>(Male : Female) |                | <b>Pakistan</b><br>(Male : Female) |                | <b>Nepal</b><br>(Male : Female) |                | <b>Bangladesh</b><br>(Male : Female) |
|--------------|-------------------------------------|----------------|---------------------------------|----------------|------------------------------------|----------------|---------------------------------|----------------|--------------------------------------|
|              | National                            | Sub-population | National                        | Sub-population | National                           | Sub-population | National                        | Sub-population | Sub-population                       |
| <b>2011</b>  | 3.54 :1*                            |                | 1.84 :1*                        |                | 2.0 :1*                            |                | 1.02 :1*                        |                |                                      |
|              | 3.77: 1                             |                |                                 |                |                                    |                |                                 |                |                                      |
| <b>2010</b>  | 3.11 :1*                            |                | 1.86 :1*                        |                | 2.34:1*                            |                | 1.14 :1*                        |                | 0.43 :1                              |
|              |                                     |                | 1.46 :1                         |                |                                    |                |                                 |                |                                      |
|              |                                     |                | 1.50 :1†                        |                |                                    |                |                                 |                |                                      |
| <b>2009</b>  | 3.36 :1*                            |                | 1.78 :1*                        |                | 2.26 :1*                           |                | 1.21 :1*                        |                |                                      |
|              |                                     |                | 1.67 :1                         |                |                                    |                |                                 |                |                                      |
| <b>2008</b>  | 3.79 :1 *                           |                | 1.78 :1*                        |                |                                    |                |                                 |                |                                      |
| <b>2007</b>  | 3.48 :1 *                           |                | 1.86 :1*                        | 1.19 :1        | 1.98 :1*                           |                |                                 |                |                                      |
| <b>2006</b>  | 3.76 :1 *                           |                | 1.78 :1*                        |                | 1.87 :1*                           | 16 :1          |                                 |                |                                      |
| <b>2005</b>  | 3:59 :1*                            |                | 1.78 :1*                        |                | 1.99 :1*                           |                |                                 |                |                                      |
|              | 3.69: 1                             |                | 1.67: 1                         |                |                                    |                |                                 |                |                                      |
|              | 3.67: 1                             |                |                                 |                |                                    |                |                                 |                |                                      |
| <b>2004</b>  |                                     |                | 1.78 :1*                        |                | 0.37 :1*                           | 2 :1           |                                 |                |                                      |
| <b>2003</b>  |                                     |                | 1.70 :1*                        |                |                                    |                |                                 |                |                                      |
| <b>2002</b>  |                                     |                | 1.70 :1*                        | 2.96 :1        |                                    |                |                                 |                |                                      |
|              |                                     |                | 1.20: 1                         |                |                                    |                |                                 |                |                                      |
| <b>2001</b>  |                                     |                | 1.47: 1                         |                |                                    |                | 1.60: 1                         |                |                                      |
|              |                                     |                |                                 |                |                                    |                | 1.25: 1†                        |                |                                      |
| <b>2000</b>  | 2.99: 1                             |                | 1.47: 1                         |                |                                    |                |                                 |                |                                      |
|              | 2.98: 1                             |                | 1.45: 1†                        |                |                                    |                |                                 |                |                                      |
| <b>1994-</b> |                                     | 0.22 :1        |                                 | 1.7 :1         |                                    | 2.3 :1         |                                 |                | 0.83 :1                              |
| <b>2010</b>  |                                     | 1.73 :1        |                                 | 5.0 :1         |                                    | 1.6 :1         |                                 |                |                                      |
| <b>#</b>     |                                     |                |                                 | 1.51 :1        |                                    |                |                                 |                |                                      |

Note: Some ratios are calculated by the research team based on presentation of male and female suicide rates; † based age-adjusted rates; \* official government rates; # average ratios over multiple years within this period.
