# Supplementary material for: Suicide in South Asia: a scoping review
Source: Springer Nature journal article supplement (doi:10.1186/s12888-014-0358-9), 2014-12-01
Supplement: MOESM3 [file 9747648]

Additional file 2: Age disaggregated data

| Country           | Year  | National | 0-14  |       |      | 15-29 |       |      | 30-44 |      |      | 45-59 |                   |                   | 60+   |                    |     |
|-------------------|-------|----------|-------|-------|------|-------|-------|------|-------|------|------|-------|-------------------|-------------------|-------|--------------------|-----|
|                   |       |          | M     | F     | All  | M     | F     | All  | M     | F    | All  | M     | F                 | All               | M     | F                  | All |
| <b>India</b>      | 2001- | Yes      | 1.2   | 1.7   |      | 25.6  | 24.9  |      | 27.4  | 15.9 |      | 26.2  | 8.4               |                   | 27.0  | 11.2               |     |
|                   | 2003  |          |       |       |      |       |       |      |       |      |      |       |                   |                   |       |                    |     |
|                   | 2006- | No       |       |       |      | 82.7  | 148.5 |      |       |      |      |       |                   |                   | 302.4 |                    |     |
|                   | 2002- | No       |       |       |      |       |       |      |       |      |      |       | 12.6 <sup>2</sup> |                   |       | 132.6 <sup>3</sup> |     |
|                   | 2004  | No       |       |       |      |       | 53.7  |      |       | 14.1 |      |       |                   |                   |       |                    |     |
| <b>Nepal</b>      | 2008  | No       |       | -     |      |       | 31.3  |      |       | 22.8 |      |       | 32.3              |                   |       |                    |     |
|                   |       |          | 10-19 |       |      | 20-29 |       |      | 30-39 |      |      | 40-49 |                   |                   | 50+   |                    |     |
| <b>Sri Lanka</b>  |       |          | M     | F     | All  | M     | F     | All  | M     | F    | All  | M     | F                 | All               | M     | F                  | All |
|                   | 2011  | Yes      | 12.0  | 11.9  |      | 14.0  | 31.9  |      | 9.2   | 32.2 |      | 5.3   | 44.8              |                   | 6.7   | 48.6               |     |
|                   | 2005  | Yes      | 13.2  | 13.5  |      | 43.4  | 20.0  |      | 49.0  | 11.4 |      | 64.1  | 8.0               |                   | 63.0  | 9.1                |     |
|                   | 2000  | Yes      | 20.4  | 15.32 |      | 42.9  | 20.8  |      | 57.0  | 17.8 |      | 67.2  | 14.0              |                   | 79.1  | 17.8               |     |
|                   | 2001  | Yes      |       |       |      |       |       | 42.0 |       |      |      |       |                   |                   |       |                    |     |
| <b>Bangladesh</b> | 1983- | No       |       |       | 61.0 |       |       | 42.0 |       |      | 24.5 |       |                   | 21.7 <sup>1</sup> |       |                    |     |
|                   | 2002  |          |       |       |      |       |       |      |       |      |      |       |                   |                   |       |                    |     |

Note: <sup>1</sup> 40+; <sup>2</sup> 45-54; <sup>3</sup> 75+
